# Supplementary material for: Bacterial community of iron tubercles from a drinking water distribution system and its occurrence in stagnant tap water
Source: Royal Society of Chemistry journal article supplement (doi:10.1039/c3em00171g), 2013-01-01
Supplement: c3em00171g.pdf [file c3em00171g.pdf]

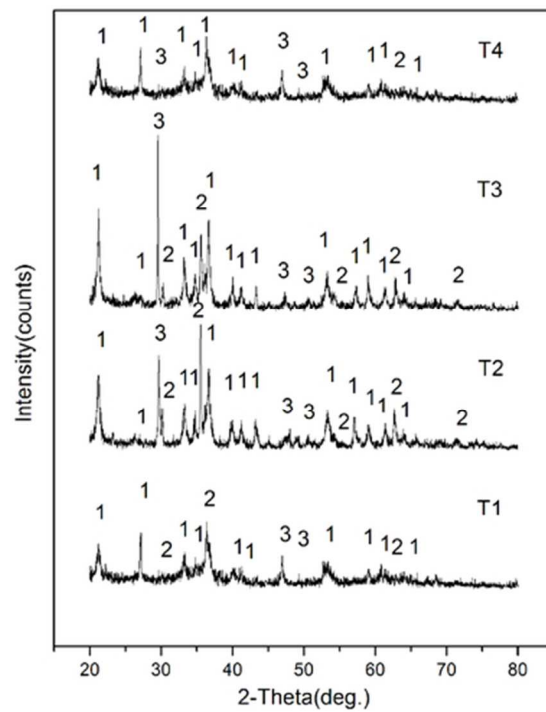

Fig. S1. XRD patterns of tubercles from pipes T1, T2, T3 and T4. Mineral phase 1 represents goethite ( $\alpha$ -FeOOH), 2 represents magnetite ( $\text{Fe}_3\text{O}_4$ ), and 3 represents calcite ( $\text{CaCO}_3$ ).

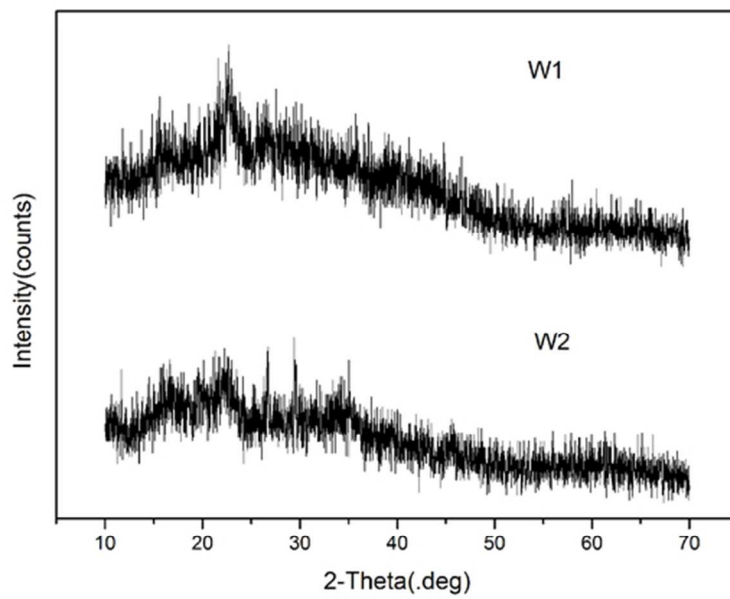

Fig. S2 XRD patterns of particulates from stagnant tap-water samples.

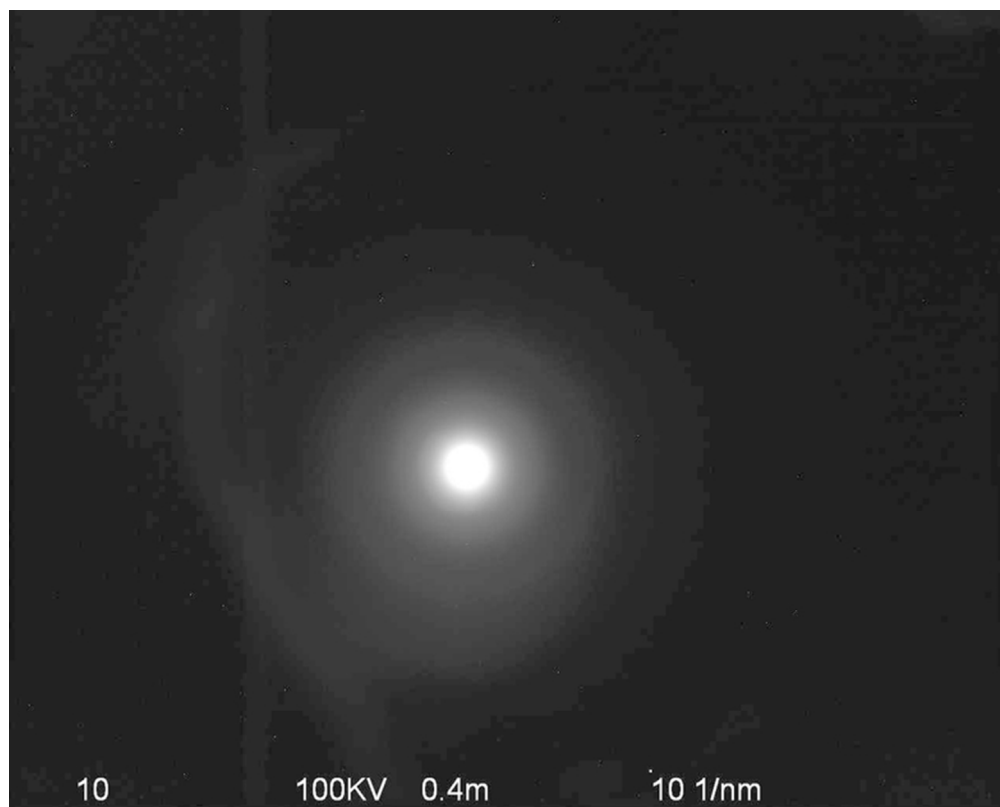

Fig. S3 SAED pattern of particulates from stagnant tap water sample W1.
